# Supplementary material for: Inter-species and inter-pathology self-supervised pre-training of deep learning models: a resource to improve the classification of veterinary thoracic radiographs
Source: Research Square preprint supplement (doi:10.21203/rs.3.rs-2520777/v1), 2023-02-06
Supplement: Supplementary file [file 2b95d3f32ce61ff5d941646e.pdf]

## Supplementary Material

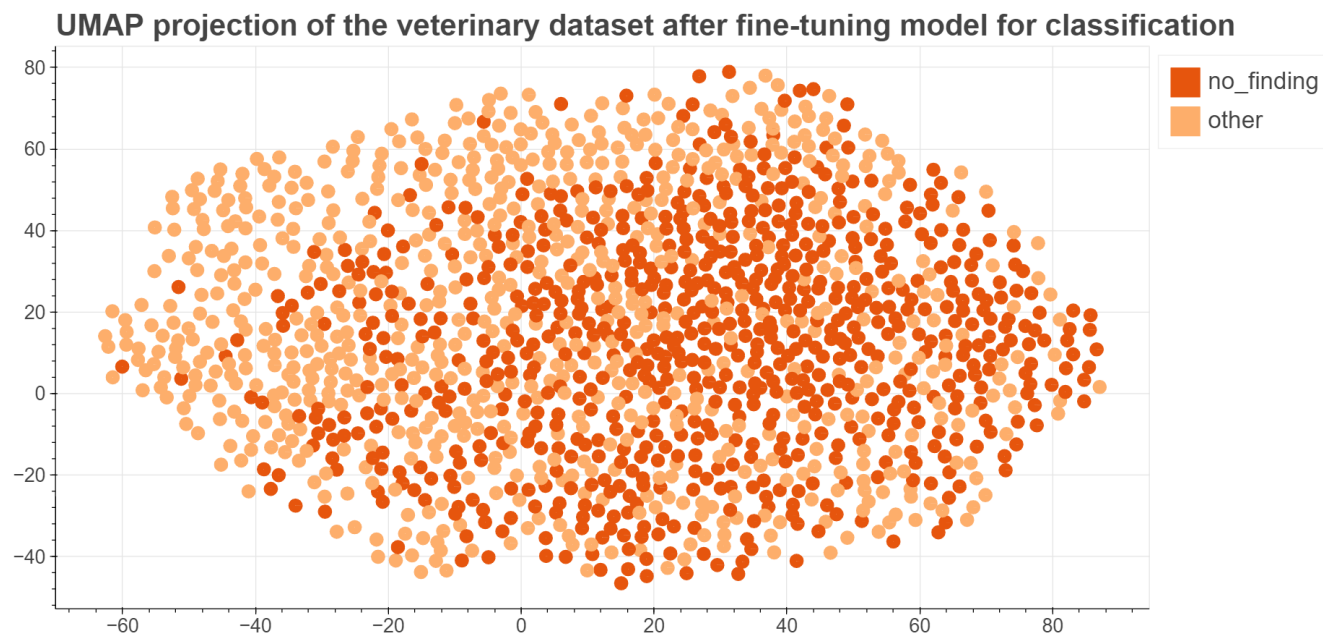

**Supplementary Figure S1.** UMAP visualizations of distribution of images from 'no finding' class in the latent spaces after fine-tuning model for classification. All of images represent only one class.

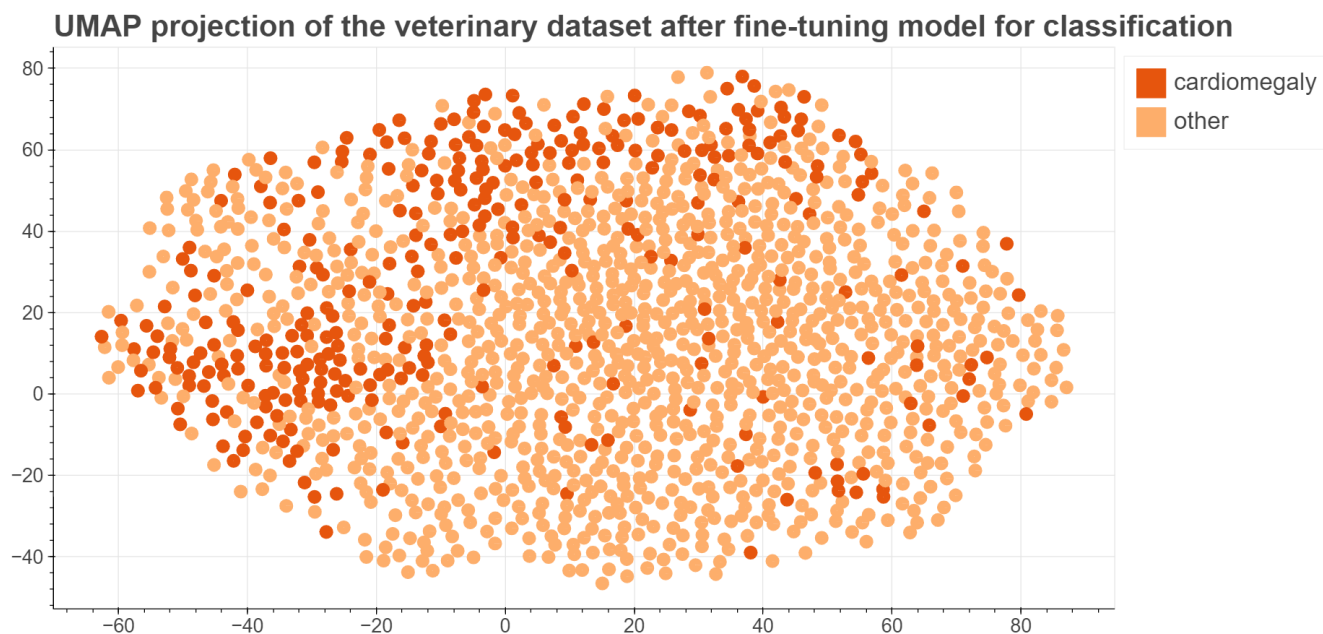

**Supplementary Figure S2.** UMAP visualizations of distribution of images from 'cardiomegaly' class in the latent spaces after fine-tuning model for classification. For this class 64% of the images belong to more than one class.

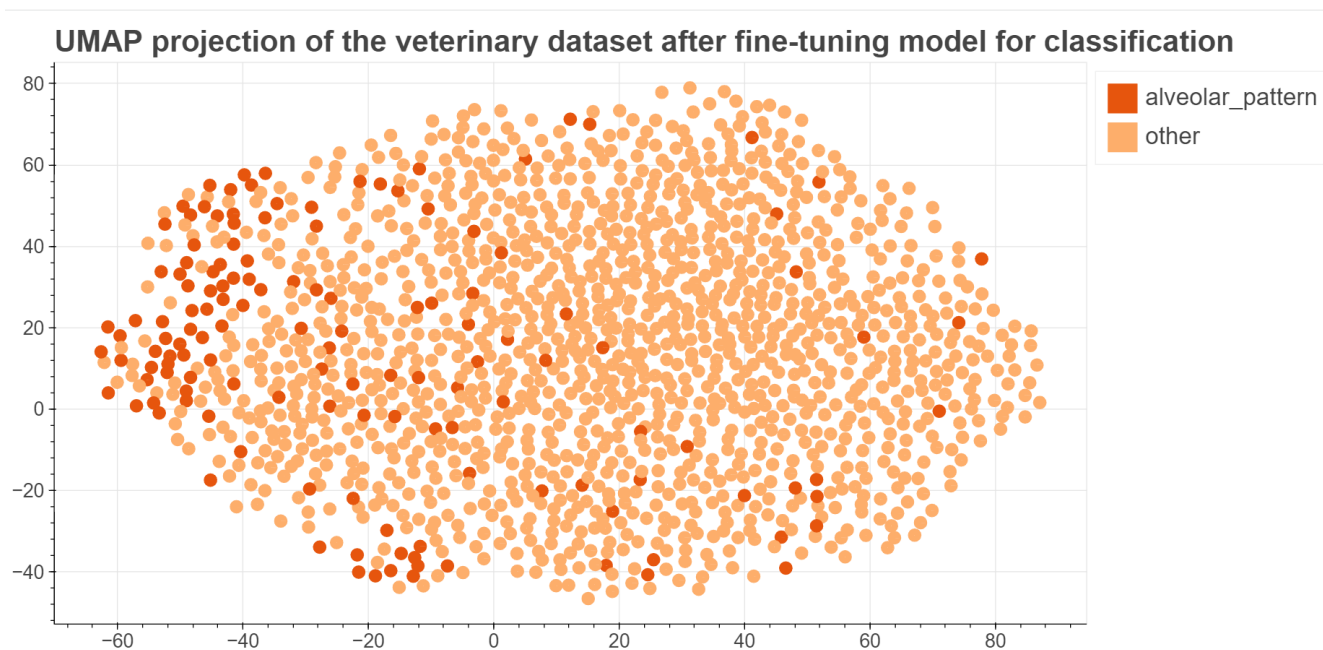

**Supplementary Figure S3.** UMAP visualizations of distribution of images from 'alveolar pattern' class in the latent spaces after fine-tuning model for classification. For this class 79% of the images belong to more than one class.

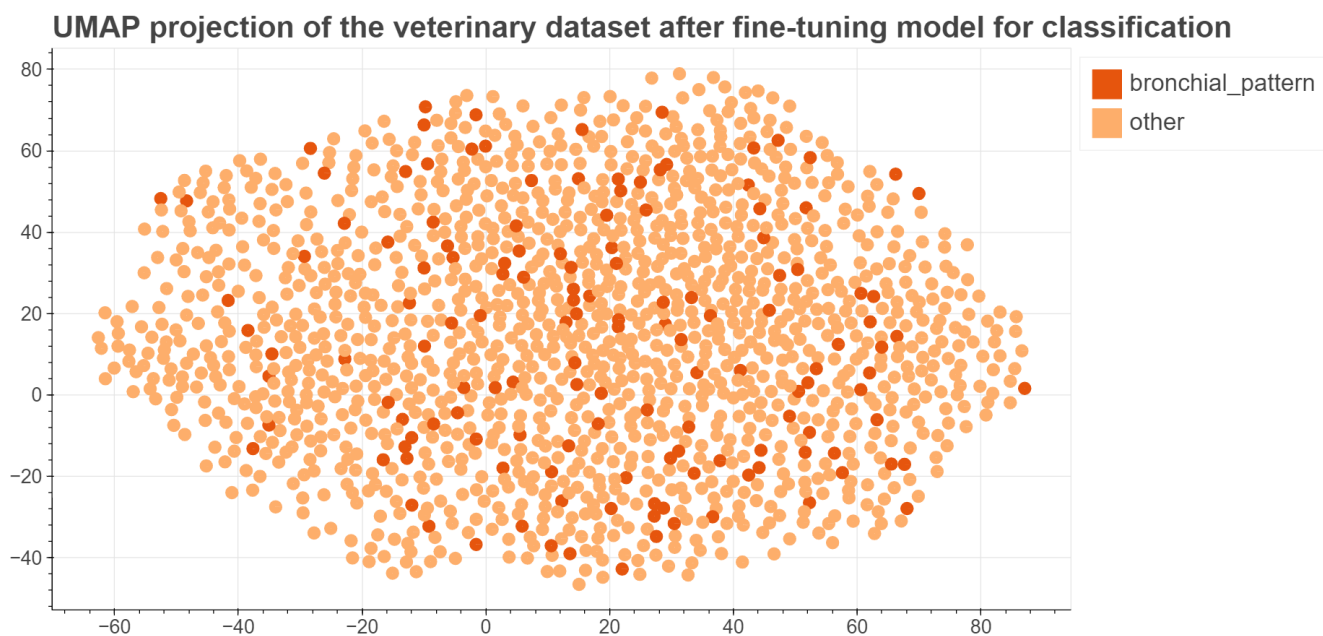

**Supplementary Figure S4.** UMAP visualizations of distribution of images from 'bronchial pattern' class in the latent spaces after fine-tuning model for classification. For this class 18% of the images belong to more than one class.

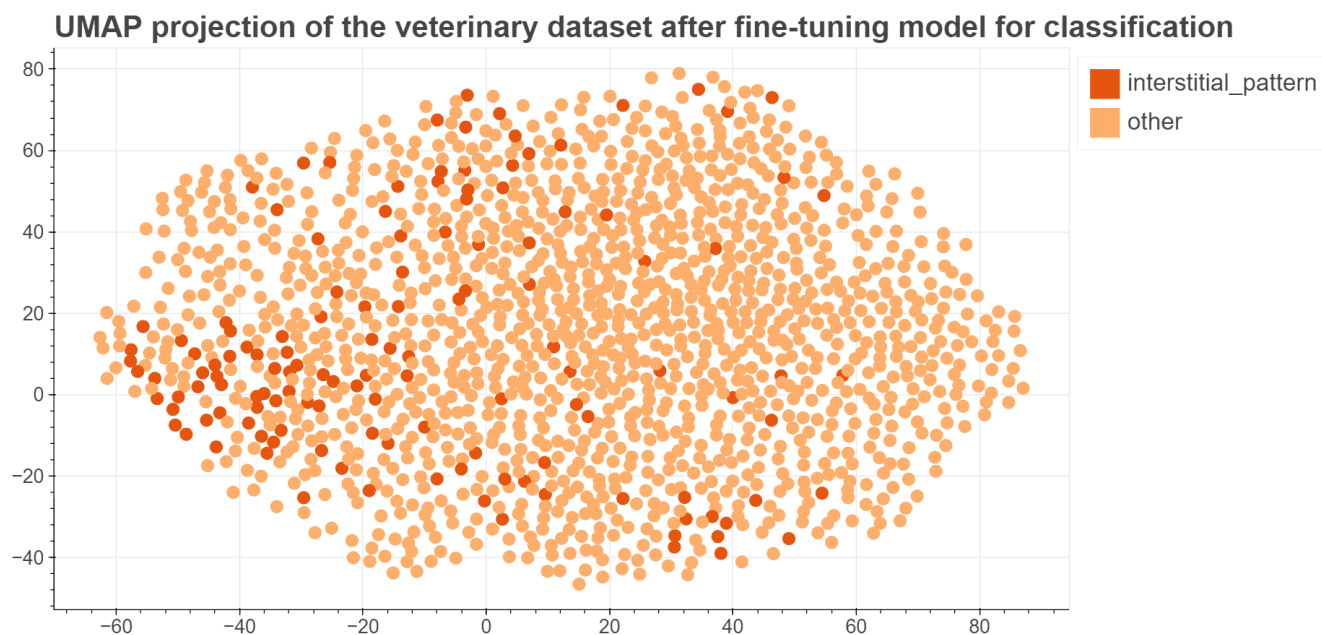

**Supplementary Figure S5.** UMAP visualizations of distribution of images from 'interstitial pattern' class in the latent spaces after fine-tuning model for classification. For this class 82% of the images belong to more than one class.

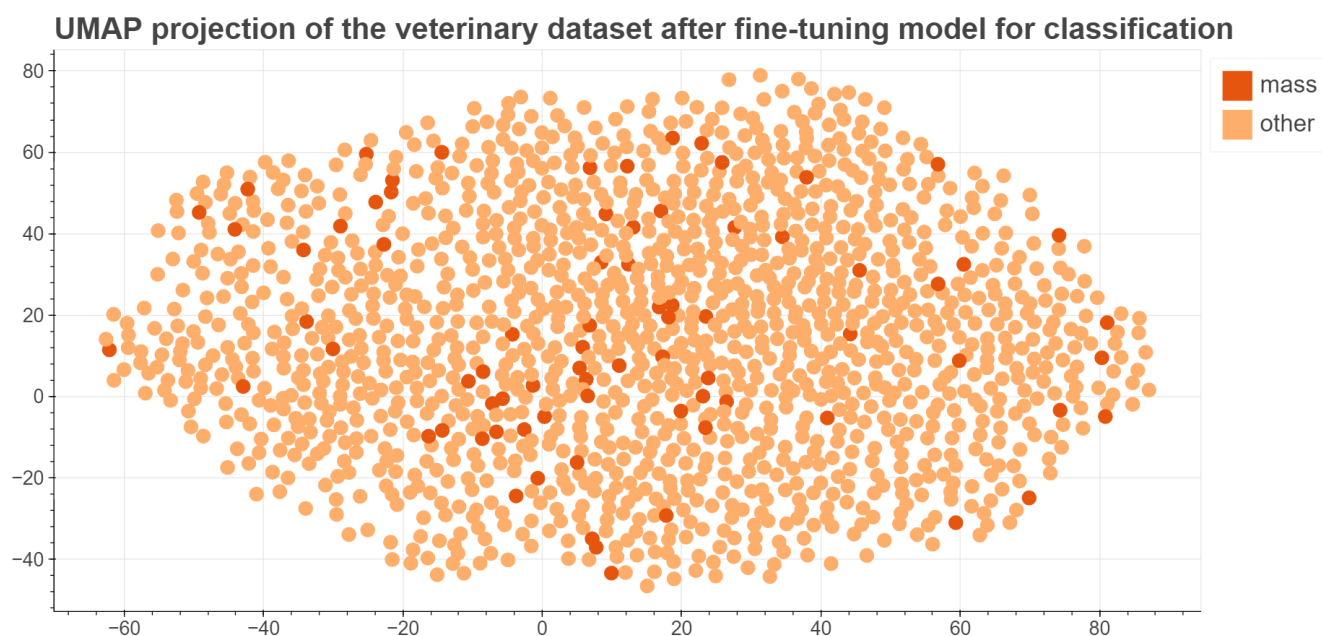

**Supplementary Figure S6.** UMAP visualizations of distribution of images from 'mass' class in the latent spaces after fine-tuning model for classification. For this class 10% of the images belong to more than one class.

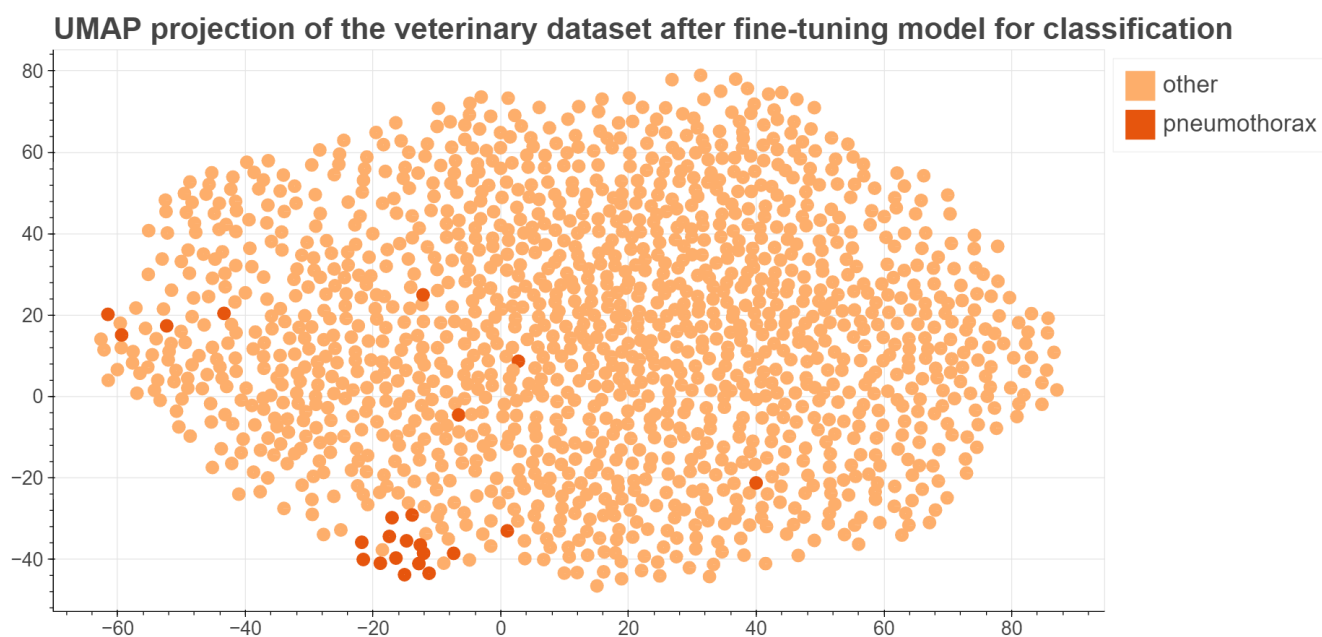

**Supplementary Figure S7.** UMAP visualizations of distribution of images from 'pneumothorax' class in the latent spaces after fine-tuning model for classification. For this class 82% of the images belong to more than one class.

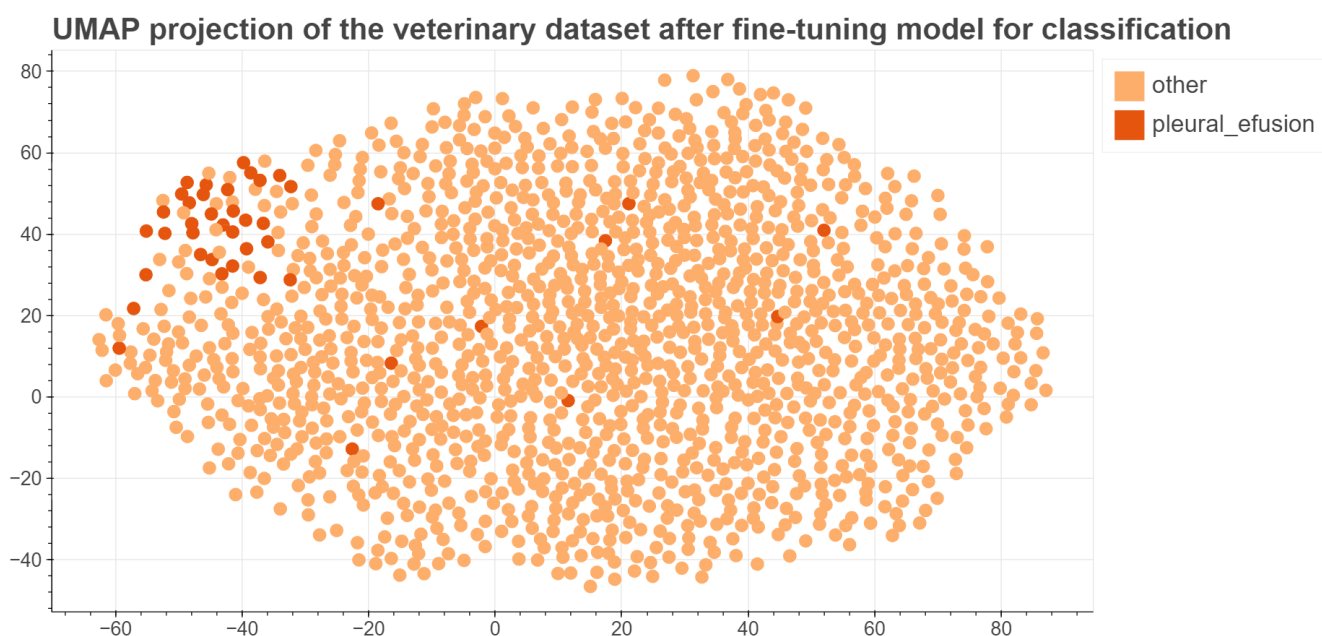

**Supplementary Figure S8.** UMAP visualizations of distribution of images from 'pleural efusion' class in the latent spaces after fine-tuning model for classification. For this class 61% of the images belong to more than one class.

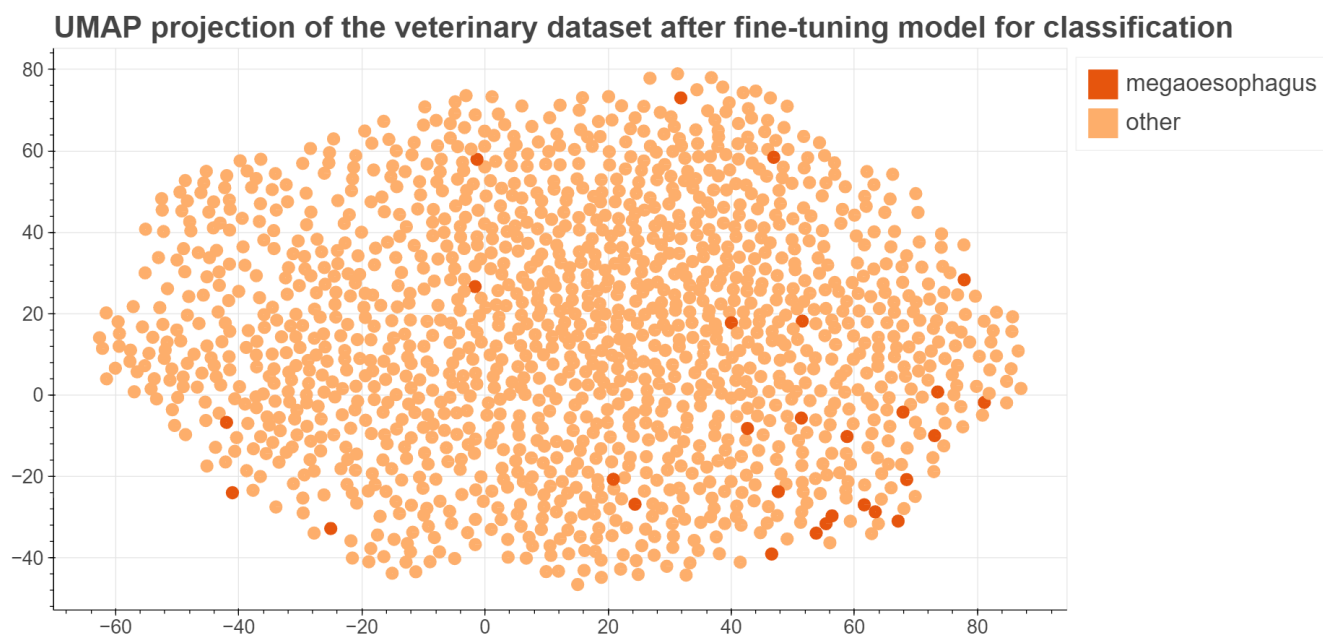

**Supplementary Figure S9.** UMAP visualizations of distribution of images from 'megaoesophagus' class in the latent spaces after fine-tuning model for classification. For this class 7% of the images belong to more than one class.
